# Supplementary material for: Transcriptional dysregulation by a nucleus-localized aminoacyl-tRNA synthetase associated with Charcot-Marie-Tooth neuropathy
Source: PubMed Central journal article supplement (PMC6834567; doi:10.1038/s41467-019-12909-9), 2019-11-06
Supplement: 41467_2019_12909_MOESM1_ESM.pdf [file 41467_2019_12909_MOESM1_ESM.pdf]

**Transcriptional dysregulation by a nucleus-localized aminoacyl-tRNA synthetase associated with Charcot-Marie-Tooth neuropathy**

Bervoets, Wei et al.

**Supplementary Information**

## Supplementary Fig. 1

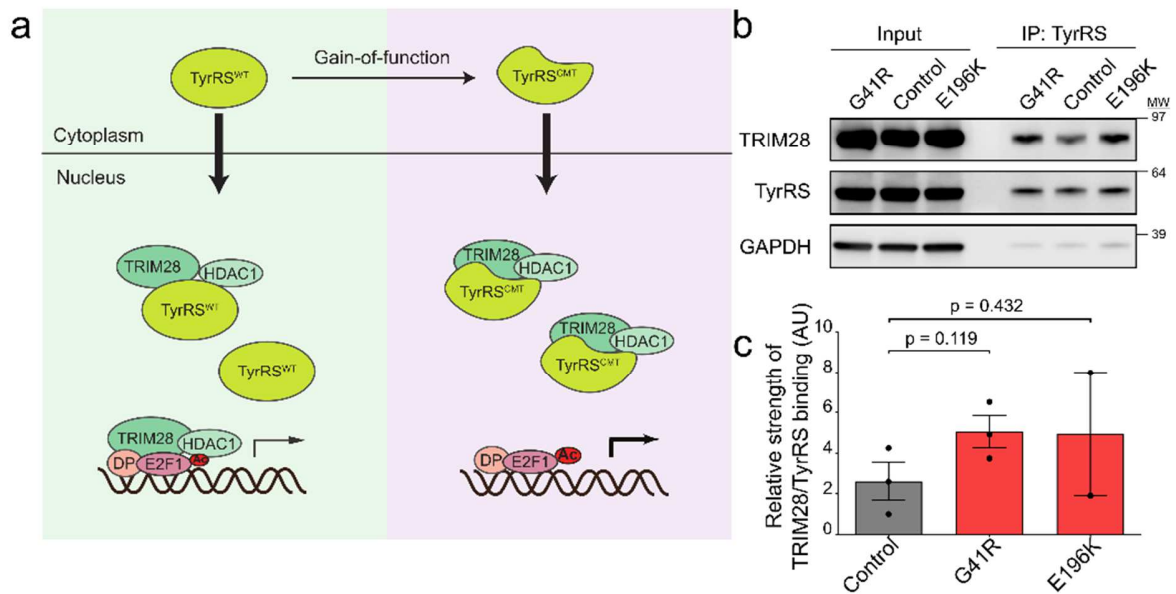

**Supplementary Figure 1. Mutant TyrRS activates E2F1 in patient cells.** (a) Schematic illustration of the mechanism through which CMT mutant TyrRS activates E2F1. Nuclear TRIM28 and HDAC1 are bound to the transcription factor E2F1 and its co-transcription factor DP, which are silenced because of HDAC1 deacetylation. In the mutant condition, TyrRS binds strongly to the TRIM28 and HDAC1 complex, releasing it from E2F1 and DP, as such activating the expression of E2F1 target genes. (b) Immunoprecipitation of endogenous TyrRS shows an interaction with endogenous TRIM28 in control and patients' PBMCs. (c) Quantification of the TRIM28-TyrRS interaction in patient derived PBMCs carrying the G41R (n=3 individuals) or E196K (n=2 individuals) mutation, compared to controls (n=3 individuals). The signal of co-purified TRIM28 was normalized to precipitated TyrRS. Unpaired t-test. Bar chart presented as means  $\pm$  s.e.m. Source data are provided as a Source Data file.

## Supplementary Fig. 2

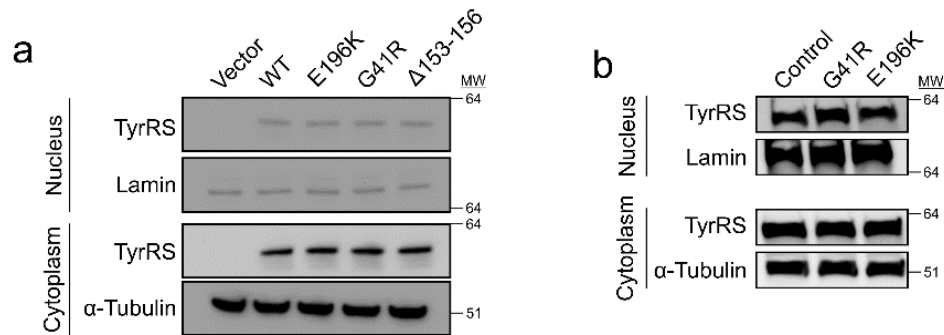

**Supplementary Figure 2. Nuclear localisation of TyrRS in mammalian cells.** (a) TyrRS localization in the cytoplasm and nucleus of HEK293T cells overexpressing different TyrRS alleles and (b) patient derived PBMCs endogenously expressing TyrRS. n=3 individual biological replicates. Source data are provided as a Source Data file.

### Supplementary Fig. 3

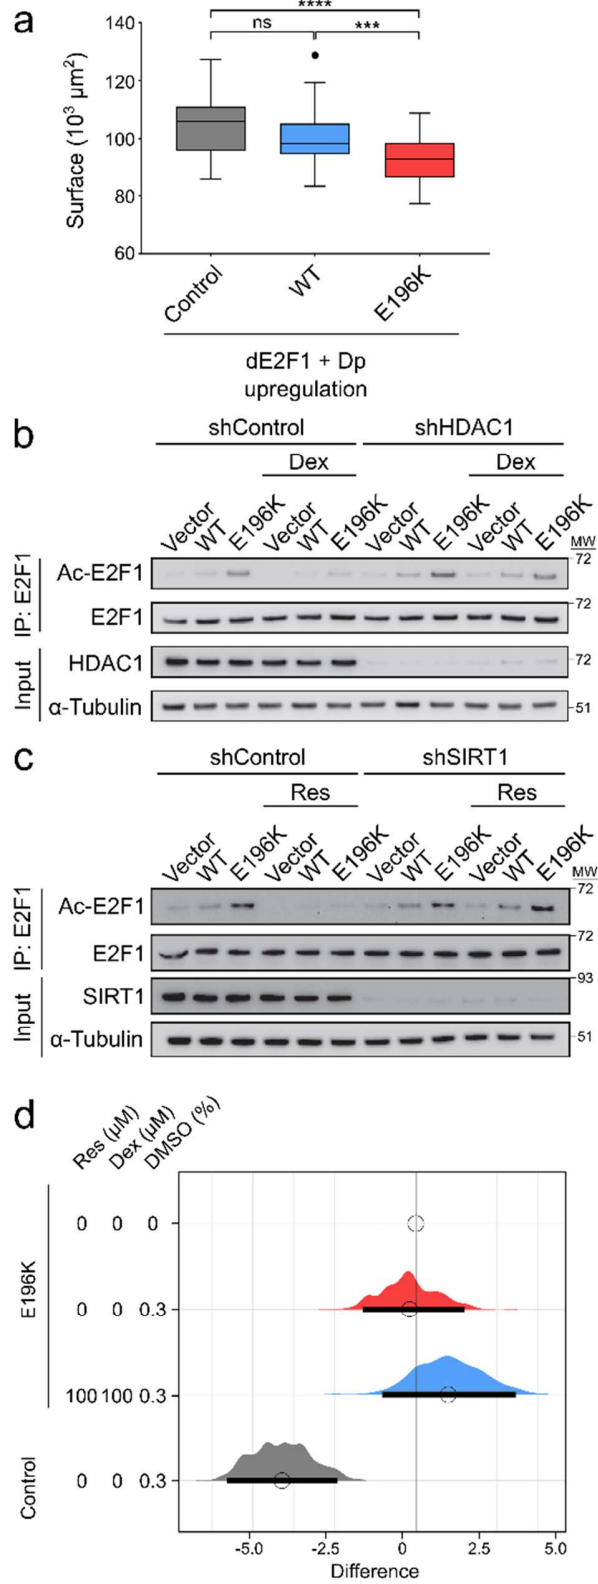

**Supplementary Figure 3. Modulation of E2F1 activity.** (a) Quantification of the rough eyes' size upon overexpression of dE2F1 and Dp in different genetic backgrounds. Box plots show the median, 25%-75% percentiles, and 1.5 interquartile range.  $n \geq 30$  eyes. One-way ANOVA with Dunnetts Multicomparisons Test. (b) Targeting specificity of dexamethasone (Dex) on HDAC1 in HEK293T cells expressing various TyrRS genes; shHDAC1, short hairpin RNA targeting HDAC1.  $n=3$  individual biological replicates. (c) Targeting specificity of resveratrol (Res) in HEK293T expressing various TyrRS genes; shSIRT1, short hairpin RNA targeting SIRT1.  $n=3$  individual biological replicates. (d) Effect sizes of the climbing performance of flies pan-neuronally expressing (*nSyb-Gal4*) TyrRS-E196K when grown on food containing a combination of resveratrol and dexamethasone.  $n \geq 10$  groups of flies. Horizontal bars depict the 95% confidence interval. Source data are provided as a Source Data file.

## Supplementary Fig. 4

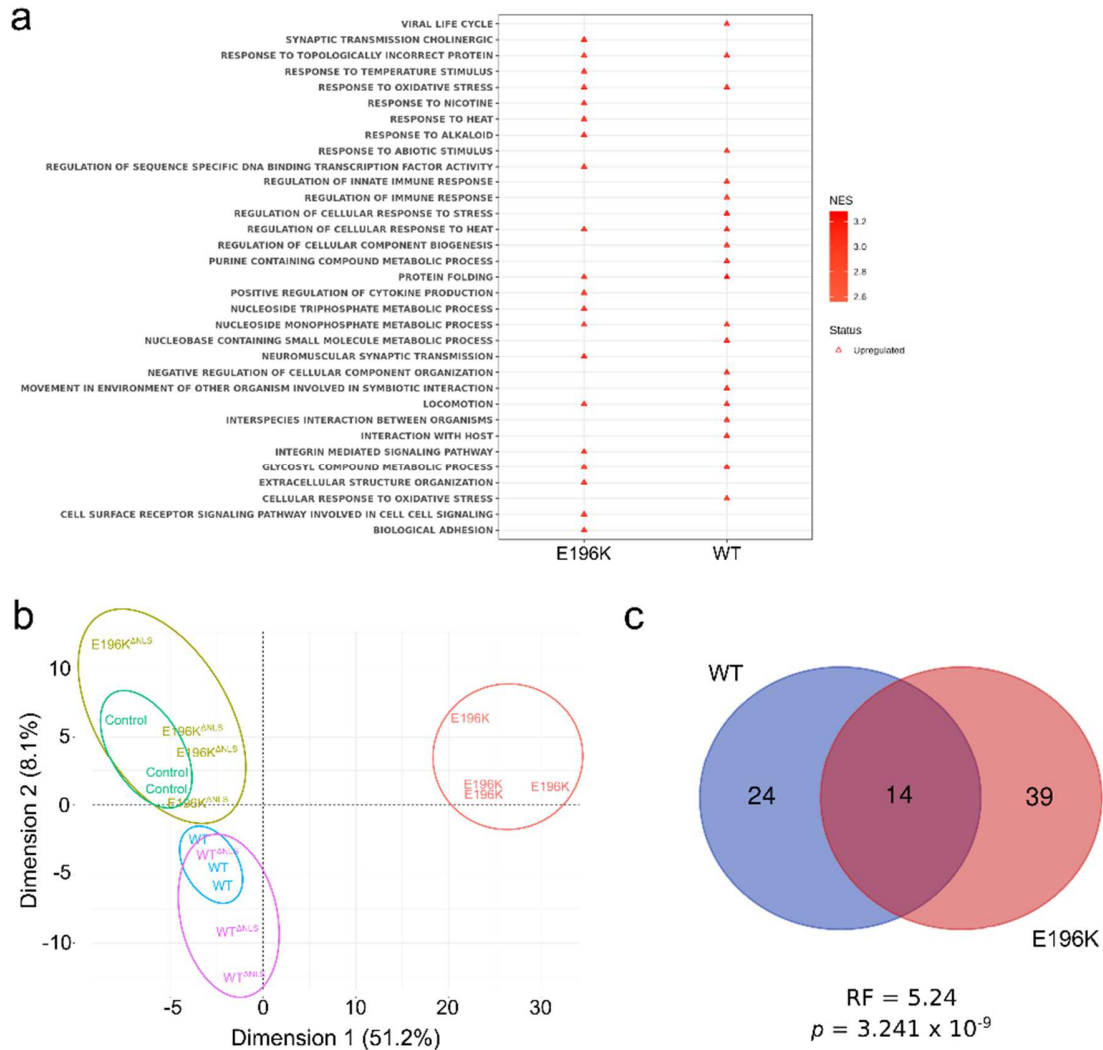

**Supplementary Figure 4. Identification of a mutant specific gene cluster.** (a) The plot shows the top 20 most enriched (NES) biological GO terms for each condition. Red triangles are overrepresented terms. The intensity of the colour defines the degree of overrepresentation. (b) PCA analysis of the cluster of 415 genes identified in control (*nSyb*>+), TyrRS-WT, TyrRS-WT<sup>ΔNLS</sup>, TyrRS-E196K, and TyrRS-E196K<sup>ΔNLS</sup> expressing flies. The colours depict the different genotypes, while the circles show the confidence intervals. (c) Venn diagram depicting the overlap between the TFs identified in the TyrRS-WT and TyrRS-E196K conditions. RF, representation factor. *P*, probability.

## Supplementary Fig. 5

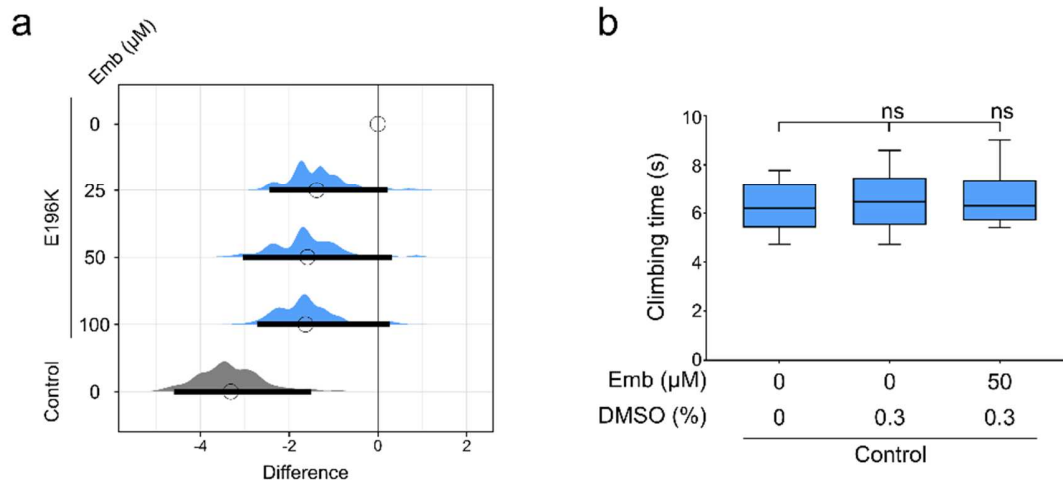

**Supplementary Figure 5. Embelin treatment rescues disease phenotypes in a model for CMT.** (a) Effect sizes of the climbing performance of flies pan-neuronally (*nSyb-Gal4*) expressing TyrRS-E196K raised on food containing embelin (Emb).  $n \geq 10$  recordings. Horizontal bars depict the 95% confidence interval. (b) Climbing performance of control flies (*nSyb-Gal4*>+) raised on normal food, food containing 0.3% DMSO (42 mM), or 50  $\mu\text{M}$  embelin in 0.3% DMSO (42 mM).  $n \geq 10$  groups of flies. Unpaired t-test. Box plots show the median, 25%-75% percentiles, and 1.5 interquartile range. Source data are provided as a Source Data file.

# Supplementary Fig. 6

**a**

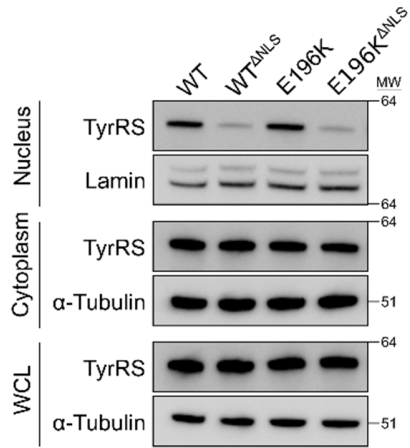

**b**

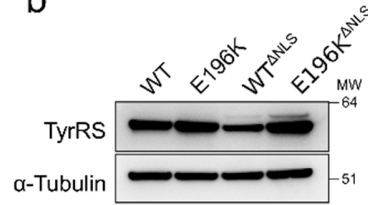

**c**

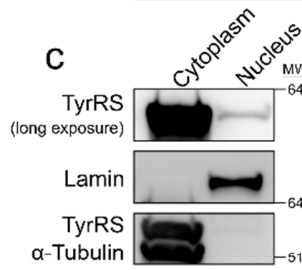

**d**

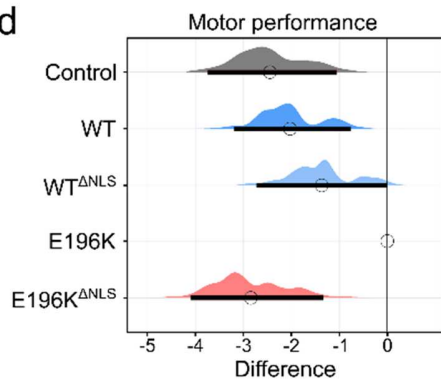

**e**

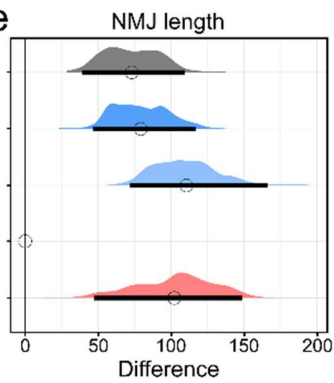

**f**

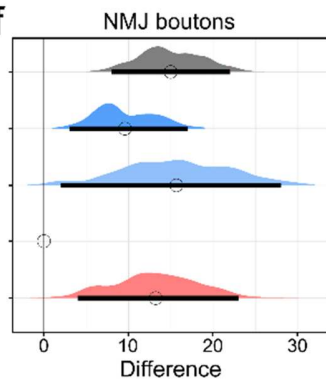

**g**

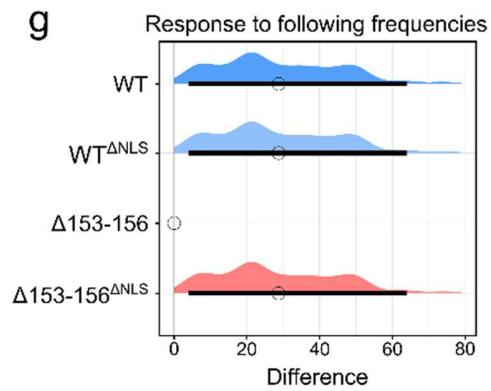



**Supplementary Figure 6. Nuclear and extracellular localization of TyrRS.** (a) Mutating the NLS sequence in TyrRS (TyrRS<sup>ΔNLS</sup>) reduces the nuclear localisation in HEK293T cells. (b) TyrRS expression levels in whole tissue lysate of heads taken from flies pan-neuronally (*nSyb-Gal4*) expressing different TyrRS alleles. The altered NLS still retains the acetylation site for PCAF (K242). Changing the surrounding basic residues from <sup>242</sup>KKKLKK<sup>247</sup> to <sup>242</sup>NNKLNK<sup>247</sup> may enhance acetylation but nevertheless disrupts nuclear translocation. We speculate that the higher molecular weight band is acetylated TyrRS which is unable to enter the nucleus (see also Fig. 5a). (c) Nuclear localization of human TyrRS in the brain of *Drosophila*.  $\alpha$ -Tubulin and Lamin were used as controls for both the cytoplasmic and nuclear fractions. (d) Effect sizes of the climbing performance of flies pan-neuronally (*nSyb-Gal4*) expressing different TyrRS alleles (n $\geq$ 10 groups of flies), as well as (e) NMJ length (n $\geq$ 10 larvae), (f) total number of boutons (n $\geq$ 10 larvae). (g) Effect sizes of the ability to follow repeated stimuli at 100 Hz upon presynaptic (*R91H05-Gal4*) expression of different TyrRS alleles in the giant fibre (n $\geq$ 20 TTMs). Horizontal bars depict the 95% confidence interval. Source data are provided as a Source Data file.

## Supplementary Fig. 7

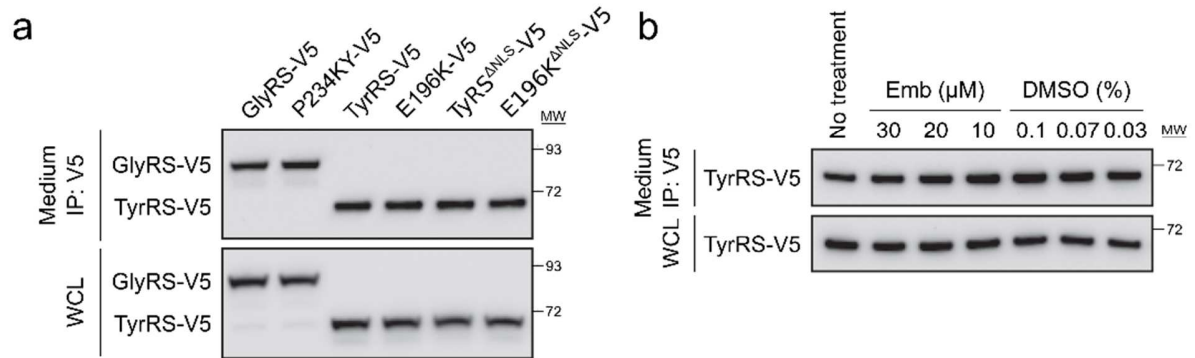

**Supplementary Figure 7. Extracellular localization of TyrRS.** (a) Neither the  $\Delta$ NLS mutation nor the CMT mutation (E196K) affects the secretion of TyrRS from HEK293T cells. n=3 individual biological replicates. (b) Embelin treatment does not affect the secretion of TyrRS from HEK293T cells. n=3 individual biological replicates. Source data are provided as a Source Data file.

**Supplementary Table 1.** GO terms enriched in the TyrRS-WT brain transcriptome

| pathway                                                                            | pval     | padj     | ES       | NES      |
|------------------------------------------------------------------------------------|----------|----------|----------|----------|
| protein folding                                                                    | 0.000186 | 0.001979 | 0.915594 | 3.27592  |
| regulation of cellular response to stress                                          | 0.000181 | 0.001979 | 0.665344 | 2.969308 |
| viral life cycle                                                                   | 0.000185 | 0.001979 | 0.81052  | 2.858782 |
| negative regulation of cellular component organization                             | 0.000187 | 0.001979 | 0.783739 | 2.843234 |
| nucleobase containing small molecule metabolic process                             | 0.000181 | 0.001979 | 0.707188 | 2.815087 |
| purine containing compound metabolic process                                       | 0.000185 | 0.001979 | 0.796817 | 2.810451 |
| locomotion                                                                         | 0.000177 | 0.001979 | 0.58513  | 2.777571 |
| glycosyl compound metabolic process                                                | 0.000184 | 0.001979 | 0.732859 | 2.775165 |
| regulation of cellular response to heat                                            | 0.000189 | 0.001979 | 0.953353 | 2.766729 |
| response to abiotic stimulus                                                       | 0.000179 | 0.001979 | 0.588885 | 2.762717 |
| response to oxidative stress                                                       | 0.000186 | 0.001979 | 0.77072  | 2.757575 |
| interaction with host                                                              | 0.000186 | 0.001979 | 0.821405 | 2.745016 |
| movement in environment of other organism involved in symbiotic interaction        | 0.000188 | 0.001979 | 0.840717 | 2.73995  |
| regulation of cellular component biogenesis                                        | 0.000181 | 0.001979 | 0.686154 | 2.73136  |
| nucleoside monophosphate metabolic process                                         | 0.000188 | 0.001979 | 0.857728 | 2.721088 |
| response to topologically incorrect protein                                        | 0.000187 | 0.001979 | 0.798428 | 2.718921 |
| interspecies interaction between organisms                                         | 0.000182 | 0.001979 | 0.6473   | 2.713604 |
| regulation of innate immune response                                               | 0.000188 | 0.001979 | 0.822985 | 2.682161 |
| regulation of apoptotic signaling pathway                                          | 0.000187 | 0.001979 | 0.769614 | 2.667114 |
| cellular response to oxidative stress                                              | 0.000188 | 0.001979 | 0.839877 | 2.664457 |
| regulation of intracellular transport                                              | 0.000182 | 0.001979 | 0.663423 | 2.657443 |
| regulation of immune response                                                      | 0.000183 | 0.001979 | 0.626814 | 2.642253 |
| nucleoside triphosphate metabolic process                                          | 0.000189 | 0.001979 | 0.905799 | 2.628723 |
| negative regulation of apoptotic signaling pathway                                 | 0.000188 | 0.001979 | 0.803049 | 2.617188 |
| regulation of protein stability                                                    | 0.000189 | 0.001979 | 0.842966 | 2.60664  |
| regulation of protein modification by small protein conjugation or removal         | 0.000189 | 0.001979 | 0.839912 | 2.597197 |
| organophosphate metabolic process                                                  | 0.000179 | 0.001979 | 0.552876 | 2.59378  |
| regulation of organelle organization                                               | 0.000183 | 0.001979 | 0.615158 | 2.593119 |
| positive regulation of cytokine production                                         | 0.000187 | 0.001979 | 0.747065 | 2.588971 |
| positive regulation of sequence specific dna binding transcription factor activity | 0.000189 | 0.001979 | 0.836591 | 2.586928 |
| regulation of sequence specific dna binding transcription factor activity          | 0.000187 | 0.001979 | 0.746185 | 2.58592  |
| regulation of response to stress                                                   | 0.000174 | 0.001979 | 0.509312 | 2.584051 |
| positive regulation of nf kappab transcription factor activity                     | 0.00019  | 0.001979 | 0.86032  | 2.578492 |
| negative regulation of protein modification process                                | 0.000182 | 0.001979 | 0.595183 | 2.573752 |
| cellular response to stress                                                        | 0.000175 | 0.001979 | 0.492046 | 2.54659  |
| positive regulation of immune system process                                       | 0.000182 | 0.001979 | 0.611083 | 2.5397   |
| regulation of defense response                                                     | 0.000182 | 0.001979 | 0.632831 | 2.534901 |
| regulation of extrinsic apoptotic signaling pathway                                | 0.00019  | 0.001979 | 0.844031 | 2.529669 |
| regulation of cytokine production                                                  | 0.000184 | 0.001979 | 0.667971 | 2.529451 |
| carbohydrate derivative metabolic process                                          | 0.000175 | 0.001979 | 0.496212 | 2.428891 |
| regulation of immune system process                                                | 0.000179 | 0.001979 | 0.521947 | 2.407745 |
| negative regulation of cell death                                                  | 0.000181 | 0.001979 | 0.538211 | 2.386464 |
| positive regulation of intracellular signal transduction                           | 0.000181 | 0.001979 | 0.52429  | 2.376241 |
| mitochondrion organization                                                         | 0.000185 | 0.001979 | 0.63441  | 2.37135  |
| regulation of cellular localization                                                | 0.000178 | 0.001979 | 0.499839 | 2.358642 |
| integrin mediated signaling pathway                                                | 0.000372 | 0.003623 | 0.643664 | 2.302979 |
| negative regulation of cell communication                                          | 0.000177 | 0.001979 | 0.474043 | 2.256679 |
| negative regulation of intracellular transport                                     | 0.000568 | 0.005349 | 0.76576  | 2.222314 |
| positive regulation of gene expression                                             | 0.000175 | 0.001979 | 0.445661 | 2.181449 |
| regulation of transport                                                            | 0.000173 | 0.001979 | 0.414103 | 2.161893 |
| regulation of cell death                                                           | 0.000175 | 0.001979 | 0.43587  | 2.155957 |
| positive regulation of multicellular organismal process                            | 0.000355 | 0.003516 | 0.450231 | 2.152064 |
| regulation of intracellular signal transduction                                    | 0.000174 | 0.001979 | 0.426078 | 2.151723 |
| positive regulation of establishment of protein localization                       | 0.001304 | 0.011712 | 0.643175 | 2.1494   |
| positive regulation of cell communication                                          | 0.000174 | 0.001979 | 0.413295 | 2.117931 |
| negative regulation of response to stimulus                                        | 0.000176 | 0.001979 | 0.425999 | 2.099468 |
| anatomical structure homeostasis                                                   | 0.002992 | 0.022695 | 0.609033 | 2.073968 |

|                                                          |          |          |          |          |
|----------------------------------------------------------|----------|----------|----------|----------|
| regulation of cellular protein localization              | 0.002607 | 0.020575 | 0.61951  | 2.070313 |
| positive regulation of cellular protein localization     | 0.003201 | 0.023966 | 0.651446 | 2.066674 |
| positive regulation of intracellular transport           | 0.001898 | 0.015778 | 0.689257 | 2.065791 |
| dna repair                                               | 0.001811 | 0.015556 | 0.518848 | 2.065368 |
| negative regulation of intracellular signal transduction | 0.002801 | 0.021807 | 0.558181 | 2.05544  |
| regulation of intracellular protein transport            | 0.001893 | 0.015778 | 0.704406 | 2.04426  |
| positive regulation of biosynthetic process              | 0.000349 | 0.003513 | 0.405074 | 2.036267 |
| positive regulation of organelle organization            | 0.003722 | 0.027517 | 0.567611 | 2.030868 |
| posttranscriptional regulation of gene expression        | 0.004483 | 0.03154  | 0.585867 | 2.030335 |
| phosphate containing compound metabolic process          | 0.000171 | 0.001979 | 0.377274 | 2.028116 |
| regulation of cytoplasmic transport                      | 0.003926 | 0.02866  | 0.558785 | 2.027149 |
| sexual reproduction                                      | 0.005397 | 0.037083 | 0.557749 | 1.99558  |
| positive regulation of molecular function                | 0.000173 | 0.001979 | 0.374551 | 1.987173 |
| negative regulation of transport                         | 0.002915 | 0.022403 | 0.484624 | 1.977694 |
| positive regulation of response to stimulus              | 0.000173 | 0.001979 | 0.36849  | 1.952936 |
| regulation of protein modification process               | 0.000173 | 0.001979 | 0.369408 | 1.938571 |
| organonitrogen compound metabolic process                | 0.00052  | 0.004975 | 0.364133 | 1.929845 |
| regulation of protein localization                       | 0.005098 | 0.035445 | 0.472983 | 1.912226 |
| negative regulation of protein metabolic process         | 0.001732 | 0.015096 | 0.352082 | 1.856882 |
| positive regulation of transport                         | 0.00639  | 0.041466 | 0.433768 | 1.844904 |
| chromosome organization                                  | 0.00639  | 0.041466 | 0.43339  | 1.843295 |
| cellular response to dna damage stimulus                 | 0.007303 | 0.045861 | 0.429494 | 1.826724 |
| positive regulation of hydrolase activity                | 0.006684 | 0.042892 | 0.399185 | 1.789283 |
| vesicle mediated transport                               | 0.005969 | 0.040066 | -0.33742 | -1.71455 |
| organic anion transport                                  | 0.006769 | 0.042966 | -0.4573  | -1.85924 |
| regulation of exocytosis                                 | 0.007447 | 0.046265 | -0.58199 | -1.87552 |
| lipid catabolic process                                  | 0.006074 | 0.040308 | -0.51014 | -1.88374 |
| aminoglycan biosynthetic process                         | 0.005705 | 0.038738 | -0.61965 | -1.93166 |
| developmental process involved in reproduction           | 0.004088 | 0.029113 | -0.53252 | -1.93344 |
| ion transport                                            | 0.001163 | 0.01061  | -0.3754  | -1.94196 |
| regulation of receptor activity                          | 0.004049 | 0.029113 | -0.58796 | -1.94586 |
| regulated exocytosis                                     | 0.002367 | 0.018941 | -0.54839 | -1.99104 |
| secretion by cell                                        | 0.002368 | 0.018941 | -0.52013 | -2.02612 |
| cellular lipid catabolic process                         | 0.001918 | 0.015778 | -0.61499 | -2.0353  |
| secretion                                                | 0.001339 | 0.011848 | -0.48997 | -2.05889 |
| exocytosis                                               | 0.00108  | 0.010013 | -0.56084 | -2.11411 |
| bicarbonate transport                                    | 0.000211 | 0.002165 | -0.78497 | -2.44701 |

ES, Enrichment Score

NES, Normalized Enrichment Score

**Supplementary Table 2.** Transcription factors enriched in the TyrRS-WT brain transcriptome, in both up-and down-regulated gene lists.

| <b>Transcription factor</b>                   | <b>Gene symbol</b> | <b>E-score</b> | <b>Targets</b> | <b>Motifs/Tracks</b> |
|-----------------------------------------------|--------------------|----------------|----------------|----------------------|
| <b>Downregulated gene list</b>                |                    |                |                |                      |
| grain                                         | grn                | 4.741          | 120            | 32                   |
| longitudinals lacking                         | lola               | 4.521          | 47             | 5                    |
| gemini                                        | gem                | 4.192          | 94             | 6                    |
| TBP-associated factor 1                       | Taf1               | 3.735          | 51             | 1                    |
| CG9727                                        | CG9727             | 3.726          | 56             | 6                    |
| Hormone receptor 3                            | Hr46               | 3.699          | 31             | 1                    |
| Dorsal root ganglia homeobox                  | CG34340            | 3.317          | 50             | 6                    |
| bigmax                                        | bigmax             | 3.246          | 57             | 2                    |
| glass                                         | gl                 | 3.209          | 55             | 4                    |
| maternal gene required for meiosis            | mamo               | 3.196          | 32             | 3                    |
| Forkhead box K                                | fd68A              | 3.180          | 40             | 3                    |
| Jun-related antigen                           | Jra                | 3.164          | 94             | 5                    |
| Myocyte enhancer factor 2                     | Mef2               | 3.084          | 44             | 3                    |
| Cyclic-AMP response element binding protein B | CrebB-17A          | 3.020          | 65             | 2                    |
| pleiohomeotic                                 | pho                | 2.883          | 17             | 1                    |
| proboscipedia                                 | pb                 | 2.843          | 29             | 2                    |
| Kruppel                                       | Kr                 | 2.695          | 24             | 1                    |
| glial cells missing                           | gcm                | 2.627          | 11             | 1                    |
| hairy                                         | h                  | 2.615          | 63             | 2                    |
| forkhead box, sub-group O                     | foxo               | 2.544          | 20             | 1                    |
| <b>Upregulated gene list</b>                  |                    |                |                |                      |
| Rel                                           | Rel                | 5.600          | 122            | 23                   |
| Activating transcription factor 3             | Atf3               | 5.214          | 124            | 55                   |
| grain                                         | grn                | 4.649          | 186            | 22                   |
| Cyclic-AMP response element binding protein B | CrebB-17A          | 3.967          | 77             | 12                   |
| Ecdysone receptor                             | EcR                | 3.636          | 58             | 3                    |
| TBP-associated factor 1                       | Taf1               | 3.534          | 68             | 2                    |
| E2F transcription factor 1                    | E2f                | 3.496          | 32             | 3                    |
| cap-n-collar                                  | cnc                | 3.360          | 63             | 3                    |
| extra macrochaetae                            | emc                | 3.350          | 34             | 2                    |
| vriille                                       | vri                | 3.284          | 41             | 5                    |
| Myocyte enhancer factor 2                     | Mef2               | 3.094          | 76             | 8                    |
| Atf6                                          | Atf6               | 3.085          | 59             | 3                    |
| Forkhead box K                                | fd68A              | 3.071          | 29             | 2                    |
| ken and barbie                                | ken                | 3.046          | 69             | 8                    |
| Sp1                                           | Sp1                | 2.929          | 24             | 2                    |
| pannier                                       | pnr                | 2.864          | 29             | 2                    |
| grainy head                                   | grh                | 2.692          | 85             | 3                    |
| Heat shock factor                             | Hsf                | 2.665          | 52             | 2                    |
| lame duck                                     | lmd                | 2.642          | 20             | 2                    |
| sidestep                                      | Side               | 2.604          | 51             | 2                    |
| Rfx                                           | Rfx                | 2.595          | 12             | 1                    |
| Sox100B                                       | Sox100B            | 2.557          | 14             | 1                    |

E-score, enrichment score

**Supplementary Table 3.** GO terms enriched in the TyrRS-E196K brain transcriptome

| <b>pathway</b>                                                                      | <b>pval</b> | <b>padj</b> | <b>ES</b> | <b>NES</b> |
|-------------------------------------------------------------------------------------|-------------|-------------|-----------|------------|
| neuromuscular synaptic transmission                                                 | 0.000191    | 0.00316     | 0.667553  | 2.869348   |
| synaptic transmission cholinergic                                                   | 0.000191    | 0.00316     | 0.667553  | 2.869348   |
| regulation of cellular response to heat                                             | 0.000195    | 0.00316     | 0.721983  | 2.830654   |
| integrin mediated signaling pathway                                                 | 0.000195    | 0.00316     | 0.790135  | 2.816679   |
| response to nicotine                                                                | 0.00019     | 0.00316     | 0.616832  | 2.810326   |
| response to heat                                                                    | 0.000194    | 0.00316     | 0.855255  | 2.761712   |
| protein folding                                                                     | 0.000188    | 0.00316     | 0.526361  | 2.736879   |
| response to temperature stimulus                                                    | 0.000195    | 0.00316     | 0.76746   | 2.735845   |
| nucleoside triphosphate metabolic process                                           | 0.000195    | 0.00316     | 0.69798   | 2.680139   |
| regulation of sequence specific dna binding transcription factor activity           | 0.000195    | 0.00316     | 0.747169  | 2.663513   |
| biological adhesion                                                                 | 0.000186    | 0.00316     | 0.468612  | 2.651161   |
| response to alkaloid                                                                | 0.000188    | 0.00316     | 0.547559  | 2.630954   |
| cell surface receptor signaling pathway involved in cell cell signaling             | 0.00019     | 0.00316     | 0.57704   | 2.629027   |
| nucleoside monophosphate metabolic process                                          | 0.000192    | 0.00316     | 0.653991  | 2.623176   |
| positive regulation of cytokine production                                          | 0.000192    | 0.00316     | 0.651962  | 2.615036   |
| response to oxidative stress                                                        | 0.000191    | 0.00316     | 0.59135   | 2.607821   |
| response to topologically incorrect protein                                         | 0.000195    | 0.00316     | 0.778937  | 2.604571   |
| regulation of protein modification by small protein conjugation or removal          | 0.000191    | 0.00316     | 0.603022  | 2.591972   |
| glycosyl compound metabolic process                                                 | 0.000192    | 0.00316     | 0.613047  | 2.58845    |
| locomotion                                                                          | 0.000183    | 0.00316     | 0.427917  | 2.580618   |
| regulation of apoptotic signaling pathway                                           | 0.000192    | 0.00316     | 0.610933  | 2.579526   |
| extracellular structure organization                                                | 0.000189    | 0.00316     | 0.542674  | 2.578641   |
| negative regulation of apoptotic signaling pathway                                  | 0.000195    | 0.00316     | 0.686541  | 2.57623    |
| regulation of cytokine production                                                   | 0.00019     | 0.00316     | 0.559582  | 2.549489   |
| muscle contraction                                                                  | 0.000191    | 0.00316     | 0.581603  | 2.527428   |
| negative regulation of protein modification by small protein conjugation or removal | 0.000194    | 0.00316     | 0.781924  | 2.524917   |
| cellular response to oxidative stress                                               | 0.000195    | 0.00316     | 0.753428  | 2.519275   |
| muscle system process                                                               | 0.000191    | 0.00316     | 0.567294  | 2.501735   |
| cell matrix adhesion                                                                | 0.000195    | 0.00316     | 0.684635  | 2.501488   |
| regulation of response to cytokine stimulus                                         | 0.000194    | 0.00316     | 0.771766  | 2.492116   |
| rrna metabolic process                                                              | 0.000374    | 0.004971    | 0.471834  | 2.491509   |
| regulation of immune response                                                       | 0.000187    | 0.00316     | 0.496588  | 2.478987   |
| purine containing compound metabolic process                                        | 0.000191    | 0.00316     | 0.562126  | 2.478944   |
| regulation of innate immune response                                                | 0.000193    | 0.00316     | 0.607693  | 2.476902   |
| movement in environment of other organism involved in symbiotic interaction         | 0.000195    | 0.00316     | 0.730945  | 2.444097   |
| ribosome biogenesis                                                                 | 0.000374    | 0.004971    | 0.439829  | 2.440281   |
| regulation of mitochondrion organization                                            | 0.000195    | 0.00316     | 0.701785  | 2.42838    |
| regulation of cellular response to stress                                           | 0.000374    | 0.004971    | 0.457624  | 2.41647    |
| regulation of extrinsic apoptotic signaling pathway                                 | 0.000195    | 0.00316     | 0.718662  | 2.403026   |
| interaction with host                                                               | 0.000195    | 0.00316     | 0.657118  | 2.40095    |
| translational initiation                                                            | 0.000193    | 0.00316     | 0.577876  | 2.393706   |
| regulation of protein stability                                                     | 0.000195    | 0.00316     | 0.669358  | 2.386131   |
| positive regulation of immune system process                                        | 0.000565    | 0.006366    | 0.45541   | 2.385259   |
| regulation of immune system process                                                 | 0.00037     | 0.004971    | 0.405488  | 2.349494   |
| cell substrate adhesion                                                             | 0.000195    | 0.00316     | 0.599125  | 2.348967   |
| locomotory behavior                                                                 | 0.000384    | 0.004971    | 0.585011  | 2.346496   |
| negative regulation of cell death                                                   | 0.000374    | 0.004971    | 0.426703  | 2.325219   |
| negative regulation of protein modification process                                 | 0.000564    | 0.006366    | 0.452559  | 2.317243   |
| establishment of protein localization to endoplasmic reticulum                      | 0.000384    | 0.004971    | 0.576855  | 2.313781   |
| cell motility                                                                       | 0.000374    | 0.004971    | 0.416973  | 2.313467   |
| adult behavior                                                                      | 0.00039     | 0.004971    | 0.612725  | 2.299237   |
| synaptic signaling                                                                  | 0.000563    | 0.006366    | 0.478037  | 2.296912   |
| chloride transport                                                                  | 0.000388    | 0.004971    | 0.705657  | 2.278641   |
| inorganic anion transport                                                           | 0.000388    | 0.004971    | 0.705657  | 2.278641   |
| protein localization to membrane                                                    | 0.00057     | 0.006366    | 0.478577  | 2.250402   |

|                                                                    |          |          |          |          |
|--------------------------------------------------------------------|----------|----------|----------|----------|
| establishment of protein localization to membrane                  | 0.000576 | 0.006366 | 0.53196  | 2.246081 |
| protein targeting to membrane                                      | 0.000576 | 0.006366 | 0.53196  | 2.246081 |
| regulation of membrane potential                                   | 0.000955 | 0.009455 | 0.514068 | 2.233948 |
| nuclear transcribed mrna catabolic process nonsense mediated decay | 0.001157 | 0.01065  | 0.536034 | 2.220385 |
| behavior                                                           | 0.000751 | 0.007658 | 0.461396 | 2.216954 |
| protein localization to endoplasmic reticulum                      | 0.001156 | 0.01065  | 0.531599 | 2.166748 |
| system process                                                     | 0.000179 | 0.00316  | 0.332111 | 2.163896 |
| nucleobase containing small molecule metabolic process             | 0.001119 | 0.01065  | 0.427254 | 2.153488 |
| single organism behavior                                           | 0.00192  | 0.016977 | 0.508368 | 2.146469 |
| regulation of cell death                                           | 0.00055  | 0.006366 | 0.353846 | 2.139163 |
| regulation of cellular component biogenesis                        | 0.001524 | 0.013845 | 0.458309 | 2.131525 |
| organophosphate metabolic process                                  | 0.000745 | 0.007658 | 0.374905 | 2.110485 |
| response to abiotic stimulus                                       | 0.000728 | 0.007658 | 0.340591 | 2.109951 |
| positive regulation of intracellular signal transduction           | 0.002252 | 0.019393 | 0.436916 | 2.09933  |
| positive regulation of molecular function                          | 0.000545 | 0.006366 | 0.326942 | 2.072152 |
| cell cell signaling                                                | 0.001125 | 0.01065  | 0.386857 | 2.069431 |
| regulation of defense response                                     | 0.002612 | 0.021158 | 0.405535 | 2.062454 |
| ribonucleoprotein complex biogenesis                               | 0.001116 | 0.01065  | 0.362227 | 2.059418 |
| viral life cycle                                                   | 0.002073 | 0.018085 | 0.399088 | 2.059328 |
| regulation of rna stability                                        | 0.00293  | 0.022586 | 0.593648 | 2.054195 |
| skeletal muscle organ development                                  | 0.002729 | 0.021287 | 0.5466   | 2.051101 |
| muscle organ development                                           | 0.002699 | 0.021287 | 0.490917 | 2.033502 |
| muscle structure development                                       | 0.002662 | 0.021265 | 0.439582 | 2.021794 |
| regulation of response to stress                                   | 0.000726 | 0.007658 | 0.319518 | 2.016673 |
| carbohydrate derivative metabolic process                          | 0.002604 | 0.021158 | 0.35145  | 1.998148 |
| ncrna processing                                                   | 0.002617 | 0.021158 | 0.356047 | 1.994618 |
| cellular response to stress                                        | 0.000899 | 0.009029 | 0.304947 | 1.980516 |
| response to endogenous stimulus                                    | 0.000717 | 0.007658 | 0.302634 | 1.971834 |
| positive regulation of multicellular organismal process            | 0.001653 | 0.014814 | 0.329576 | 1.962972 |
| regulation of intracellular transport                              | 0.004944 | 0.03602  | 0.415963 | 1.955975 |
| leukocyte migration                                                | 0.00547  | 0.038174 | 0.497239 | 1.949507 |
| muscle cell development                                            | 0.006623 | 0.042219 | 0.530265 | 1.937458 |
| regulation of anion transport                                      | 0.007406 | 0.044638 | 0.541904 | 1.931784 |
| muscle tissue development                                          | 0.006336 | 0.040787 | 0.477705 | 1.916089 |
| negative regulation of response to stimulus                        | 0.002569 | 0.021158 | 0.319252 | 1.912638 |
| response to nitrogen compound                                      | 0.005018 | 0.03616  | 0.330144 | 1.899439 |
| transmembrane transport                                            | 0.003084 | 0.023499 | 0.29932  | 1.889192 |
| regulation of ion transport                                        | 0.007132 | 0.044193 | 0.391979 | 1.883412 |
| cellular response to lipid                                         | 0.006203 | 0.040785 | 0.581742 | 1.878508 |
| circulatory system process                                         | 0.008217 | 0.049076 | 0.431824 | 1.876546 |
| negative regulation of cell communication                          | 0.005362 | 0.037822 | 0.323326 | 1.873426 |
| immune system process                                              | 0.003431 | 0.025558 | 0.28875  | 1.85615  |
| negative regulation of cellular component organization             | 0.007332 | 0.044599 | 0.361639 | 1.851705 |
| membrane organization                                              | 0.006916 | 0.043257 | 0.329866 | 1.847947 |
| positive regulation of response to stimulus                        | 0.004739 | 0.034913 | 0.292654 | 1.82159  |
| carbohydrate metabolic process                                     | 0.005675 | 0.03919  | 0.29652  | 1.813848 |
| positive regulation of gene expression                             | 0.005076 | 0.036188 | 0.282459 | 1.797109 |
| ion transmembrane transport                                        | 0.007201 | 0.044205 | 0.301663 | 1.789553 |
| positive regulation of cell communication                          | 0.00829  | 0.049076 | 0.305043 | 1.778672 |
| regulation of transport                                            | 0.006252 | 0.040785 | 0.269694 | 1.778518 |
| positive regulation of biosynthetic process                        | 0.006275 | 0.040785 | 0.272493 | 1.77545  |
| interspecies interaction between organisms                         | 0.008523 | 0.049569 | 0.301766 | 1.771992 |
| phosphate containing compound metabolic process                    | 0.006724 | 0.04246  | 0.256848 | 1.751409 |
| response to organic cyclic compound                                | 0.00842  | 0.049404 | 0.284458 | 1.740063 |
| chromatin assembly or disassembly                                  | 0.008621 | 0.0497   | -0.48811 | -1.87239 |
| negative regulation of peptidase activity                          | 0.006241 | 0.040785 | -0.36207 | -1.87281 |
| small gtpase mediated signal transduction                          | 0.006158 | 0.040785 | -0.4877  | -1.92174 |
| dna packaging                                                      | 0.006158 | 0.040785 | -0.48854 | -1.92503 |
| bicarbonate transport                                              | 0.003303 | 0.024886 | -0.61316 | -1.99763 |
| neutral lipid metabolic process                                    | 0.002457 | 0.020885 | -0.59745 | -2.01706 |

ES, Enrichment Score

NES, Normalized Enrichment Score

**Supplementary Table 4.** Overlap GO terms between the E196K and WT brain transcriptomes

| <b>Biological process</b>                                                           | <b>NES</b>   |           |
|-------------------------------------------------------------------------------------|--------------|-----------|
|                                                                                     | <b>E196K</b> | <b>WT</b> |
| adult behavior                                                                      | 2.3**        |           |
| aminoglycan biosynthetic process                                                    |              | -1.9*     |
| anatomical structure homeostasis                                                    |              | 2.1*      |
| behavior                                                                            | 2.2**        |           |
| bicarbonate transport                                                               | -2.0*        | -2.4**    |
| biological adhesion                                                                 | 2.7**        |           |
| carbohydrate derivative metabolic process                                           | 2.0*         | 2.4**     |
| carbohydrate metabolic process                                                      | 1.8*         |           |
| cellular lipid catabolic process                                                    |              | -2.0*     |
| cellular response to dna damage stimulus                                            |              | 1.8*      |
| cellular response to lipid                                                          | 1.9*         |           |
| cellular response to oxidative stress                                               | 2.5**        | 2.7**     |
| cellular response to stress                                                         | 2.0**        | 2.5**     |
| cell cell signaling                                                                 | 2.1*         |           |
| cell matrix adhesion                                                                | 2.5**        |           |
| cell motility                                                                       | 2.3**        |           |
| cell substrate adhesion                                                             | 2.3**        |           |
| cell surface receptor signaling pathway involved in cell cell signaling             | 2.6**        |           |
| chloride transport                                                                  | 2.3**        |           |
| chromatin assembly or disassembly                                                   | -1.9*        |           |
| chromosome organization                                                             |              | 1.8*      |
| circulatory system process                                                          | 1.9*         |           |
| developmental process involved in reproduction                                      |              | -1.9*     |
| dna packaging                                                                       | -1.9*        |           |
| dna repair                                                                          |              | 2.1*      |
| establishment of protein localization to endoplasmic reticulum                      | 2.3**        |           |
| establishment of protein localization to membrane                                   | 2.2**        |           |
| exocytosis                                                                          |              | -2.1*     |
| extracellular structure organization                                                | 2.6**        |           |
| glycosyl compound metabolic process                                                 | 2.6**        | 2.8**     |
| immune system process                                                               | 1.9*         |           |
| inorganic anion transport                                                           | 2.3**        |           |
| integrin mediated signaling pathway                                                 | 2.8**        | 2.3**     |
| interaction with host                                                               | 2.4**        | 2.7**     |
| interspecies interaction between organisms                                          | 1.8*         | 2.7**     |
| ion transmembrane transport                                                         | 1.8*         |           |
| ion transport                                                                       |              | -1.9*     |
| leukocyte migration                                                                 | 1.9*         |           |
| lipid catabolic process                                                             |              | -1.9*     |
| locomotion                                                                          | 2.6**        | 2.8**     |
| locomotory behavior                                                                 | 2.3**        |           |
| membrane organization                                                               | 1.8*         | 1.7       |
| mitochondrion organization                                                          |              | 2.4**     |
| movement in environment of other organism involved in symbiotic interaction         | 2.4**        | 2.7**     |
| muscle cell development                                                             | 1.9*         |           |
| muscle contraction                                                                  | 2.5**        |           |
| muscle organ development                                                            | 2.0*         |           |
| muscle structure development                                                        | 2.0*         |           |
| muscle system process                                                               | 2.5**        |           |
| muscle tissue development                                                           | 1.9*         |           |
| ncrna processing                                                                    | 2.0*         |           |
| negative regulation of apoptotic signaling pathway                                  | 2.6**        | 2.6**     |
| negative regulation of cellular component organization                              | 1.9*         | 2.8**     |
| negative regulation of cell communication                                           | 1.9*         | 2.3**     |
| negative regulation of cell death                                                   | 2.3**        | 2.4**     |
| negative regulation of intracellular signal transduction                            |              | 2.1*      |
| negative regulation of intracellular transport                                      |              | 2.2**     |
| negative regulation of peptidase activity                                           | -1.9*        |           |
| negative regulation of protein modification by small protein conjugation or removal | 2.5**        |           |



|                                                                                    |       |       |
|------------------------------------------------------------------------------------|-------|-------|
| negative regulation of protein modification process                                | 2.3** | 2.6** |
| negative regulation of response to stimulus                                        | 1.9*  | 2.1** |
| negative regulation of transport                                                   |       | 2.0*  |
| neuromuscular synaptic transmission                                                | 2.9** |       |
| neutral lipid metabolic process                                                    | -2.0* |       |
| nuclear transcribed mma catabolic process nonsense mediated decay                  | 2.2*  |       |
| nucleobase containing small molecule metabolic process                             | 2.2*  | 2.8** |
| nucleoside monophosphate metabolic process                                         | 2.6** | 2.7** |
| nucleoside triphosphate metabolic process                                          | 2.7** | 2.6** |
| organic anion transport                                                            | -1.8  | -1.9* |
| organonitrogen compound metabolic process                                          |       | 1.9** |
| organophosphate metabolic process                                                  | 2.1** | 2.6** |
| phosphate containing compound metabolic process                                    | 1.8*  | 2.0** |
| positive regulation of biosynthetic process                                        | 1.8*  | 2.0** |
| positive regulation of cellular protein localization                               |       | 2.1*  |
| positive regulation of cell communication                                          | 1.8*  | 2.1** |
| positive regulation of cytokine production                                         | 2.6** | 2.6** |
| positive regulation of establishment of protein localization                       |       | 2.1*  |
| positive regulation of gene expression                                             | 1.8*  | 2.2** |
| positive regulation of hydrolase activity                                          |       | 1.8*  |
| positive regulation of immune system process                                       | 2.4** | 2.5** |
| positive regulation of intracellular signal transduction                           | 2.1*  | 2.4** |
| positive regulation of intracellular transport                                     |       | 2.1*  |
| positive regulation of molecular function                                          | 2.1** | 2.0** |
| positive regulation of multicellular organismal process                            | 2.0*  | 2.2** |
| positive regulation of nf kappa b transcription factor activity                    |       | 2.6** |
| positive regulation of organelle organization                                      |       | 2.0*  |
| positive regulation of response to stimulus                                        | 1.8*  | 2.0** |
| positive regulation of sequence specific dna binding transcription factor activity |       | 2.6** |
| positive regulation of transport                                                   |       | 1.8*  |
| posttranscriptional regulation of gene expression                                  |       | 2.0*  |
| protein folding                                                                    | 2.7** | 3.3** |
| protein localization to endoplasmic reticulum                                      | 2.2*  |       |
| protein localization to membrane                                                   | 2.3** |       |
| protein targeting to membrane                                                      | 2.2** |       |
| purine containing compound metabolic process                                       | 2.5** | 2.8** |
| regulated exocytosis                                                               |       | -2.0* |
| regulation of anion transport                                                      | 1.9*  |       |
| regulation of apoptotic signaling pathway                                          | 2.6** | 2.7** |
| regulation of cellular component biogenesis                                        | 2.1*  | 2.7** |
| regulation of cellular localization                                                |       | 2.4** |
| regulation of cellular protein localization                                        |       | 2.1*  |
| regulation of cellular response to heat                                            | 2.8** | 2.8** |
| regulation of cellular response to stress                                          | 2.4** | 3.0** |
| regulation of cell death                                                           | 2.1** | 2.2** |
| regulation of cytokine production                                                  | 2.5** | 2.5** |
| regulation of cytoplasmic transport                                                |       | 2.0*  |
| regulation of defense response                                                     | 2.1*  | 2.5** |
| regulation of exocytosis                                                           |       | -1.9* |
| regulation of extrinsic apoptotic signaling pathway                                | 2.4** | 2.5** |
| regulation of immune response                                                      | 2.5** | 2.6** |
| regulation of immune system process                                                | 2.3** | 2.4** |
| regulation of innate immune response                                               | 2.5** | 2.7** |
| regulation of intracellular protein transport                                      |       | 2.0*  |
| regulation of intracellular signal transduction                                    |       | 2.2** |
| regulation of intracellular transport                                              | 2.0*  | 2.7** |
| regulation of ion transport                                                        | 1.9*  |       |
| regulation of membrane potential                                                   | 2.2** |       |
| regulation of mitochondrion organization                                           | 2.4** |       |
| regulation of organelle organization                                               |       | 2.6** |
| regulation of protein localization                                                 |       | 1.9*  |
| regulation of protein modification by small protein conjugation or removal         | 2.6** | 2.6** |

|                                                                           |       |       |
|---------------------------------------------------------------------------|-------|-------|
| regulation of protein modification process                                |       | 1.9** |
| regulation of protein stability                                           | 2.4** | 2.6** |
| regulation of receptor activity                                           |       | -1.9* |
| regulation of response to cytokine stimulus                               | 2.5** |       |
| regulation of response to stress                                          | 2.0** | 2.6** |
| regulation of rna stability                                               | 2.1*  |       |
| regulation of sequence specific dna binding transcription factor activity | 2.7** | 2.6** |
| regulation of transport                                                   | 1.8*  | 2.2** |
| response to abiotic stimulus                                              | 2.1** | 2.8** |
| response to alkaloid                                                      | 2.6** |       |
| response to endogenous stimulus                                           | 2.0** |       |
| response to heat                                                          | 2.8** |       |
| response to nicotine                                                      | 2.8** |       |
| response to nitrogen compound                                             | 1.9*  |       |
| response to organic cyclic compound                                       | 1.7*  |       |
| response to oxidative stress                                              | 2.6** | 2.8** |
| response to temperature stimulus                                          | 2.7** |       |
| response to topologically incorrect protein                               | 2.6** | 2.7** |
| ribonucleoprotein complex biogenesis                                      | 2.1*  |       |
| ribosome biogenesis                                                       | 2.4** |       |
| rrna metabolic process                                                    | 2.5** |       |
| secretion                                                                 |       | -2.1* |
| secretion by cell                                                         |       | -2.0* |
| sexual reproduction                                                       |       | 2.0*  |
| single organism behavior                                                  | 2.1*  |       |
| skeletal muscle organ development                                         | 2.1*  |       |
| small gtpase mediated signal transduction                                 | -1.9* |       |
| synaptic signaling                                                        | 2.3** |       |
| synaptic transmission cholinergic                                         | 2.9** |       |
| system process                                                            | 2.2** |       |
| translational initiation                                                  | 2.4** |       |
| transmembrane transport                                                   | 1.9*  |       |
| vesicle mediated transport                                                |       | -1.7* |
| viral life cycle                                                          | 2.1*  | 2.9** |

\* p<0.05

\*\* p<0.01

**Supplementary Table 5.** Genes used in qPCR validation, showing their fold change in RNAseq and qPCR

| <b>E2F1 target gene</b> | <b>Fold change RNAseq</b> | <b>Fold change qPCR</b> |
|-------------------------|---------------------------|-------------------------|
| <i>dad</i>              | 1.11                      | 3.42                    |
| <i>drpr</i>             | 1.28                      | 1.59                    |
| <i>siz</i>              | 1.1                       | 3.35                    |
| <i>spi</i>              | 1.11                      | 2.08                    |
| <i>DNApol-iota</i>      | 1.18                      | 1.94                    |
| <i>csk</i>              | 1.12                      | 3.31                    |
| <i>sals</i>             | 1.2                       | 1.76                    |

**Supplementary Table 6.** Transcription factors enriched in the TyrRS-E196K brain transcriptome, in both up- and down-regulated gene lists.

| Transcription factor                          | Gene symbol | E-score | Targets | Motifs |
|-----------------------------------------------|-------------|---------|---------|--------|
| <b>Downregulated gene list</b>                |             |         |         |        |
| DNA replication-related element factor        | Dref        | 11.113  | 77      | 12     |
| cropped                                       | crp         | 7.670   | 52      | 13     |
| longitudinals lacking                         | lola        | 5.701   | 27      | 5      |
| Zinc-finger protein interacting with CP190    | CG7928      | 5.546   | 45      | 3      |
| nautilus                                      | nau         | 4.520   | 42      | 4      |
| Heat shock factor                             | Hsf         | 4.121   | 37      | 8      |
| Cyclic-AMP response element binding protein A | CrebA       | 4.010   | 25      | 10     |
| Myocyte enhancer factor 2                     | Mef2        | 3.931   | 31      | 6      |
| Hormone-receptor-like in 78                   | Hr78        | 3.794   | 48      | 7      |
| tango                                         | tgo         | 3.768   | 40      | 32     |
| CG7786                                        | CG7786      | 3.693   | 25      | 5      |
| crocodile                                     | croc        | 3.631   | 13      | 2      |
| TBP-associated factor 1                       | Taf1        | 3.630   | 25      | 1      |
| pannier                                       | pnr         | 3.532   | 45      | 11     |
| broad                                         | br          | 3.476   | 13      | 2      |
| Topoisomerase 2                               | Top2        | 3.473   | 19      | 2      |
| jumeau                                        | jumu        | 3.426   | 16      | 2      |
| Chorion factor 2                              | Cf2         | 3.380   | 28      | 18     |
| araucan                                       | ara         | 3.367   | 23      | 4      |
| Rfx                                           | Rfx         | 3.322   | 13      | 2      |
| p53                                           | p53         | 3.226   | 27      | 5      |
| senseless                                     | sens        | 3.194   | 15      | 2      |
| Hormone receptor-like in 39                   | Hr39        | 3.120   | 28      | 3      |
| pangolin                                      | pan         | 3.068   | 7       | 1      |
| CG17829                                       | CG17829     | 3.052   | 16      | 1      |
| gemini                                        | gem         | 2.780   | 10      | 1      |
| stripe                                        | sr          | 2.776   | 6       | 4      |
| grain                                         | grn         | 2.714   | 21      | 4      |
| hamlet                                        | ham         | 2.689   | 8       | 1      |
| nejire                                        | nej         | 2.578   | 6       | 1      |
| scratch                                       | scrt        | 2.560   | 35      | 2      |
| schnurri                                      | shn         | 2.521   | 10      | 1      |
| <b>Upregulated gene list</b>                  |             |         |         |        |
| slow border cells                             | slbo        | 4.816   | 54      | 18     |
| Transcription factor IIB                      | TfIIIB      | 4.070   | 30      | 4      |
| grainy head                                   | grh         | 3.976   | 39      | 3      |
| wicked                                        | wcd         | 3.923   | 12      | 1      |
| Hormone receptor 3                            | Hr46        | 3.607   | 54      | 5      |
| forkhead box, sub-group O                     | foxo        | 3.582   | 22      | 1      |
| Cyclic-AMP response element binding protein B | CrebB-17A   | 3.557   | 72      | 24     |
| snail                                         | sna         | 3.403   | 45      | 7      |
| E2F transcription factor                      | E2f         | 3.283   | 57      | 6      |
| gemini                                        | gem         | 3.260   | 30      | 2      |
| erect wing                                    | ewg         | 3.180   | 37      | 5      |
| ovo                                           | ovo         | 3.166   | 15      | 1      |
| Mesoderm-expressed 2                          | Mes2        | 3.139   | 45      | 7      |
| TATA binding protein                          | Tbp         | 3.134   | 51      | 4      |
| Zn finger homeodomain 1                       | zfh1        | 3.129   | 42      | 2      |
| Hormone receptor-like in 38                   | Hr38        | 2.987   | 23      | 2      |
| Ptx1                                          | Ptx1        | 2.984   | 42      | 3      |
| cropped                                       | crp         | 2.936   | 55      | 6      |
| Heat shock factor                             | Hsf         | 2.856   | 38      | 3      |
| brinker                                       | brk         | 2.757   | 40      | 3      |
| achintya                                      | achi        | 2.719   | 33      | 2      |
| cousin of atonal                              | cato        | 2.629   | 19      | 3      |
| sloppy paired 2                               | slp2        | 2.614   | 6       | 1      |
| Hormone receptor-like in 39                   | Hr39        | 2.558   | 34      | 1      |

---

|                           |     |       |    |   |
|---------------------------|-----|-------|----|---|
| pleiohomeotic             | pho | 2.508 | 17 | 1 |
| E-score, enrichment score |     |       |    |   |

**Supplementary Table 7.** GO terms enriched for the transcription factors in the TyrRS-E196K brain transcriptome

| <b>Term</b>                                                          | <b>Count</b> | <b>%</b> | <b>P-Value</b> | <b>Benjamini</b> |
|----------------------------------------------------------------------|--------------|----------|----------------|------------------|
| positive regulation of transcription from RNA polymerase II promoter | 15           | 39,5     | 4,6E-15        | 1,2E-12          |
| regulation of transcription, DNA-templated                           | 15           | 39,5     | 1,1E-11        | 1,5E-9           |
| dendrite morphogenesis                                               | 11           | 28,9     | 2,3E-10        | 2,1E-8           |
| transcription, DNA-templated                                         | 13           | 34,2     | 1,3E-9         | 8,7E-8           |
| regulation of transcription from RNA polymerase II promoter          | 10           | 26,3     | 3,1E-9         | 1,7E-7           |
| negative regulation of transcription from RNA polymerase II promoter | 9            | 23,7     | 2,1E-8         | 9,3E-7           |
| positive regulation of transcription, DNA-templated                  | 8            | 21,1     | 9,4E-8         | 3,6E-6           |
| muscle organ development                                             | 6            | 15,8     | 6,8E-6         | 2,3E-4           |
| regulation of glucose metabolic process                              | 7            | 18,4     | 2,1E-5         | 6,3E-4           |
| transcription from RNA polymerase II promoter                        | 5            | 13,2     | 6,4E-5         | 1,7E-3           |
| neuron development                                                   | 4            | 10,5     | 5,4E-4         | 1,3E-2           |
| steroid hormone mediated signaling pathway                           | 3            | 7,9      | 1,5E-3         | 3,4E-2           |
| central nervous system development                                   | 4            | 10,5     | 2,4E-3         | 4,9E-2           |
| imaginal disc-derived wing morphogenesis                             | 5            | 13,2     | 5,3E-3         | 9,8E-2           |
| compound eye development                                             | 4            | 10,5     | 8,1E-3         | 1,4E-1           |
| compound eye morphogenesis                                           | 4            | 10,5     | 1,2E-2         | 1,9E-1           |
| mesodermal cell fate determination                                   | 2            | 5,3      | 1,6E-2         | 2,3E-1           |
| negative regulation of gene expression                               | 3            | 7,9      | 1,7E-2         | 2,3E-1           |
| sensory organ development                                            | 3            | 7,9      | 2,0E-2         | 2,5E-1           |
| determination of muscle attachment site                              | 2            | 5,3      | 2,9E-2         | 3,3E-1           |
| peripheral nervous system development                                | 3            | 7,9      | 3,1E-2         | 3,3E-1           |
| cell death                                                           | 2            | 5,3      | 3,9E-2         | 3,8E-1           |
| cuticle development                                                  | 2            | 5,3      | 4,8E-2         | 4,4E-1           |
| neuroblast proliferation                                             | 2            | 5,3      | 5,7E-2         | 4,9E-1           |
| transforming growth factor beta receptor signaling pathway           | 2            | 5,3      | 5,7E-2         | 4,9E-1           |
| negative regulation of transcription, DNA-templated                  | 3            | 7,9      | 5,8E-2         | 4,8E-1           |
| RNA polymerase II transcriptional preinitiation complex assembly     | 2            | 5,3      | 6,7E-2         | 5,1E-1           |
| ectoderm development                                                 | 2            | 5,3      | 7,3E-2         | 5,3E-1           |
| oogenesis                                                            | 4            | 10,5     | 8,3E-2         | 5,7E-1           |
| positive regulation of gene expression                               | 2            | 5,3      | 8,5E-2         | 5,6E-1           |
| glial cell migration                                                 | 2            | 5,3      | 9,7E-2         | 6,0E-1           |

**Supplementary Table 8.** *Drosophila* stocks used throughout the paper

| <b>Stock genotype</b>                                  | <b>Origin</b>                                            | <b>Number</b>     |
|--------------------------------------------------------|----------------------------------------------------------|-------------------|
| <i>w1118</i>                                           | BDSC                                                     | 3605              |
| <i>GMR-GAL4/CyO</i>                                    | BDSC                                                     | 8605              |
| <i>nSyb-GAL4</i>                                       | M. Leyssen & B. Dickson (HHMI's Janelia Research Campus) |                   |
| <i>Act5C-Gal4/CyO,GFP</i>                              | BDSC                                                     | derived from 4414 |
| <i>Act5C-Gal4/CyO,Tb-RFP</i>                           | BDSC                                                     | derived from 4414 |
| <i>R91H05-Gal4</i>                                     | BDSC                                                     | 40594             |
| <i>w1118; P{UAS-E2f1.N}3B P{UAS-Dp.D}1-4b/TM6B,Tb1</i> | BDSC                                                     | 4770              |
| <i>w*; P{UASp-GFP-E2f1.WT}4</i>                        | BDSC                                                     | 34058             |

**Supplementary Table 9.** qPCR primers used in the different quantification assays

| <b>Human</b>                   |                               |                              |
|--------------------------------|-------------------------------|------------------------------|
| <b>Gene</b>                    | <b>Forward primer</b>         | <b>Reverse primer</b>        |
| <i>RAD51L1</i>                 | GCATTCTTATCTACTACCCTTTC       | CTGCTATTTCAACCAGTCTTTCA      |
| <i>RAD51</i>                   | GAGTTTGGTGTAGCAGTGGTAAT       | GACAGGGAGAGTCGTAGATTTTG      |
| <i>RAD9A</i>                   | TGAGATGTGCCTTGGAGAGGAGG       | GCGAGTCGGTGTCTGAGAGTGTG      |
| <i>BRCA1</i>                   | GAAACCAGTCTCAGTGTCCAACCTCTCTA | GGTGATTTGTAACAATTCTTGATCTCCC |
| <i>GAPDH</i>                   | TGCACCACCAACTGCTTAGC          | GGCATGGACTGTGGTCATGAG        |
| <i>HPRT1</i>                   | TGACACTGGCAAAAACAATGCA        | GGTCCTTTTCACCAGCAAGCT        |
| <i>TBP</i>                     | TGCACAGGAGCCAAGAGTGAA         | CACATCACAGCTCCCCACCA         |
| <i>SDHA</i>                    | TGGGAACAAGAGGGCATCTG          | CCACCACTGCATCAAATTCATG       |
| <i>HMBS</i>                    | GGCAATGCGGCTGCAA              | GGGTACCCACGCGAATCAC          |
| <b>Drosophila melanogaster</b> |                               |                              |
| <b>Gene</b>                    | <b>Forward primer</b>         | <b>Reverse primer</b>        |
| <i>dad</i>                     | GACTGCGGTTACCAATCCAA          | CAGTGGTGTGCACTTGTTAAAAT      |
| <i>drpr</i>                    | CGCCTGCGATATAAGCGTTC          | GCAGGAGGAGTTATTCAGGCA        |
| <i>siz</i>                     | TCAGTGTTTCCTCTGACCGA          | AAAGCTTTCGCCAATTATAAAAACCC   |
| <i>spi</i>                     | CCCATTGCTTTGCGGTGAAG          | GGCCTCTTGGGCAGGTAAG          |
| <i>DNApol-iota</i>             | GGCCAACATTCTACCCTCCC          | CGCTCAAAAAGTCGCATCACA        |
| <i>csk</i>                     | GCCTTGCTTTCACCAGCAAG          | GGCAGTGTCTGAGGCAAAAA         |
| <i>trh</i>                     | GCTACACTTGGCTCCAGACC          | CCCGGTTGCTGATCACATAGT        |
| <i>sals</i>                    | GAGTCCGAGGAGTCCGAAT           | GAGTTGGGCGAGTCCTCTG          |
| <i>Act79B</i>                  | CAAGGATCTGTATGCCAACAATG       | GGTCAGCGATACCTGGATACATG      |
| <i>GAPDH</i>                   | CAGCCCCGACATGAAGGT            | CGATCTCGAAGTTGTCATTGATG      |
| <i>Dps13</i>                   | GGGTCTGAAGCCCGACATT           | GGCGACGGCCTTCTTGAT           |
| <i>PpL32</i>                   | GCTAAGCTGTGCGACAAATGG         | CGGCGACGCACTCTGTT            |
| <i>Rp49</i>                    | TACAGGCCCAAGATCGTGAA          | TCTCCTTGGCCTTCTTGGA          |
